1 **Cattle T Cell Phenotyping by an 8-Colour, 10-Parameter Panel**

2 **Eduard O. Roos<sup>1</sup>, William Mwangi<sup>1</sup>, Wilhelm Gerner<sup>1</sup>, Ryan Waters<sup>1</sup>, John A.**  
3 **Hammond<sup>1\*</sup>**

4

5 <sup>1</sup> The Pirbright Institute, Ash Road, Pirbright, Woking, Surrey, GU24 0NF, UK

6 \*Correspondence to: John Hammond; The Pirbright Institute, Ash Road, Pirbright,  
7 Woking, Surrey, GU24 0N, UK. E-mail: [john.hammond@pirbright.ac.uk](mailto:john.hammond@pirbright.ac.uk)

8

9 **Abstract:**

10 This multiplex staining panel was developed to differentiate cattle T cells into  
11 conventional (CD4 and CD8) and unconventional ( $\gamma\delta$ -TCR) subsets as well as their  
12 stage of differentiation and activation. The combination of CD45RO and CD62L  
13 allows the identification of naïve ( $T_{\text{Naïve}}$ ), central memory ( $T_{\text{CM}}$ ), effector memory  
14 ( $T_{\text{EM}}$ ) and terminal effector ( $T_{\text{TE}}$ ) T cells. Activated cattle T cells ( $T_{\text{AV}}$ ) can be  
15 identified by the cell surface expression of CD25. This panel was developed using  
16 cryopreserved cattle peripheral blood mononuclear cells (PBMCs) and tested on  
17 fresh as well as stimulated PBMCs. Therefore, this 8-colour, 10-parameter flow  
18 cytometry panel simultaneously identifies cattle  $T_{\text{Naïve}}$ ,  $T_{\text{AV}}$ ,  $T_{\text{CM}}$ ,  $T_{\text{EM}}$ ,  $T_{\text{TE}}$  and  $\gamma\delta$ -  
19 TCR cells. This panel will improve our ability to examine T cell response to  
20 pathogens and vaccines in cattle including the potential to identify previously  
21 undescribed subpopulations. Furthermore, this panel can be readily optimised for  
22 other bovid species as many of these reagents are likely to cross react.

23

24 **Key terms:**

25 Flow cytometry; cattle PBMC; T cells; naïve T cells; effector memory T cells; central  
26 memory T cells; activated T cells;  $\gamma\delta$  T cells; T cell subsets

27

28 **Background:**

29 Robust T cell responses are critical in the response to pathogen infection both for  
30 clearance and the formation of strong and broad memory responses (1). Cattle, like  
31 several other species, have a much higher proportion of  $\gamma\delta$  T cells compared to CD4  
32 and CD8 (2–4). Consequently, it is important to study the entire T cell compartment  
33 simultaneously to fully characterise how immune protection arises and persists.  
34 Furthermore, as the research climate focusses on One Health approaches, the ability  
35 to study the immune response at high resolution in species that underpin global  
36 food security is essential.

37

38 Common to several non-model species, the first mAbs to study CD molecules on  
39 cattle T cells were derived from mouse immunizations with whole cattle PBMC  
40 populations or PBMC lysates. Antibodies were characterized in three international  
41 workshops on ruminant antigens (2,5,6). Together with identification of cross-  
42 reactive mAbs, this allowed the establishment of a basic toolbox to study cattle T  
43 cells and various subsets within them (7). However, several limitations still exist for  
44 the establishment of polychromatic flow cytometry staining panels. For example,  
45 many of the current 371 human CD molecules do not have an antibody that cross  
46 react with cattle. Another major limitation is the lack of useful mAbs that are  
47 labelled to a wider range of fluorochromes. This makes it difficult to expand panels  
48 beyond the three most common fluorochromes FITC (or AF488), PE and APC (or  
49 AF647). By conjugating existing T cell markers in-house we were able to develop a

50 cattle T cell panel that utilises eight colours excluding PE and APC-conjugated  
51 antibodies. This allows the addition of specific antibodies, such as for cytokines or  
52 transcription factors, that maximises the broader utility of this panel for individual  
53 research needs. Additionally, if more of the available mAbs would be conjugated to  
54 fluorochromes that are excited by the violet laser, the panel can be further expanded.

55

56 This OMIP identifies all three main cattle T cell subsets (CD4, CD8 and  $\gamma\delta$ ), as well  
57 as their subsets that are activated ( $T_{AV}$ ) or in the distinct differentiation states of  
58 naïve ( $T_{Naïve}$ ), central memory ( $T_{CM}$ ), effector memory ( $T_{EM}$ ) and terminal effector  
59 ( $T_{TE}$ ). The gating strategy we used initially identifies the two  $\alpha\beta$  T cell subsets CD4  
60 (mAb clones CC8/CC30) and CD8 (mAb clone CC63) as well as the  $\gamma\delta$  T cells (mAb  
61 clone GB21A) (2,8) (Fig. 1). Like in swine and chickens,  $\gamma\delta$  T cells constitute a major  
62 T cell subset in cattle blood and can comprise more than 50% of circulating T cells  
63 (3,9). To identify activated T cells, CD25 (mAb clone IL-A111) can be used (8,10–12),  
64 whereas the memory state of the cells can be defined using the CD45RO (mAb clone  
65 IL-A116) and CD62L (mAb clone CC32) cell surface markers (6,8,13–15) (Fig. 1).

66 Using this gating strategy, the following known subsets can be identified for the  
67 helper T cells,  $T_{Naïve}$  ( $CD3^+\gamma\delta^-TCR\cdot CD4^+CD25^-CD45RO^-CD62L^+$ ),  $T_{CM}$  ( $CD3^+\gamma\delta^-TCR\cdot$   
68  $CD4^+CD25^-CD45RO^+CD62L^+$ ),  $T_{EM}$  ( $CD3^+\gamma\delta^-TCR\cdot CD4^+CD25^-CD45RO^+CD62L^-$ ),  $T_{TE}$   
69 ( $CD3^+\gamma\delta^-TCR\cdot CD4^+CD25^-CD45RO^-CD62L^-$ ) and  $T_{AV}$  ( $CD3^+\gamma\delta^-TCR\cdot CD4^+CD25^+$ ).

70 Similarly, the cytotoxic T cells can be separated into  $T_{Naïve}$  ( $CD3^+\gamma\delta^-TCR\cdot$   
71  $CD8\alpha^+CD25^-CD45RO^-CD62L^+$ ),  $T_{CM}$  ( $CD3^+\gamma\delta^-TCR\cdot CD8\alpha^+CD25^-CD45RO^+CD62L^+$ ),  
72  $T_{EM}$  ( $CD3^+\gamma\delta^-TCR\cdot CD8\alpha^+CD25^-CD45RO^+CD62L^-$ ),  $T_{TE}$  ( $CD3^+\gamma\delta^-TCR\cdot CD8\alpha^+CD25^-$

73 CD45RO-CD62L<sup>-</sup>) and T<sub>AV</sub> (CD3<sup>+</sup>γδ-TCR-CD8α<sup>+</sup>CD25<sup>+</sup>). Furthermore, γδ T cells can  
74 also be identified by (CD3<sup>+</sup>γδ-TCR<sup>+</sup>) (Fig. 1; Online Table 3). A major improvement  
75 by this panel is the simultaneous analysis of all these T cell subsets in a single  
76 sample, hence reducing the variation between replicates and the number of samples  
77 needed per animal.

78

79 The panel was designed and optimised on a BD LSRFortessa and was tested on a BD  
80 Aria IIIU. The BD Aria IIIU allows for sorting of the T cell subsets. Further  
81 adaptations to the panel are enabled by having both the PE and APC channel empty,  
82 for which many antibodies are commercially available. If more reagents become  
83 available in the violet channel, they can easily be added to the panel with only minor  
84 influence on compensation requirements.

85

86 In conclusion, this cattle T cell panel will advance the understanding of the cattle  
87 immune response as it allows the measurement of all major T cell subsets and their  
88 differentiation stage within a single sample.

89

90 **Similarity to published OMIPs:**

91 None to date.

92

93 **Acknowledgements:**

94 The authors wish to acknowledge the valuable input of Dr Katy Moffat for technical  
95 support on the instruments. This project received funding from the European

96 Union's Horizon 2020 research and innovation programme under the VetBioNet  
97 grant agreement (731014). The authors would like to acknowledge the Pirbright  
98 Flow Cytometry facility and the Immunological Toolbox unit supported by the  
99 United Kingdom Research and Innovation- Biotechnology and Biological Sciences  
100 Research Council awards (BBS/E/I/00007038 and BBS/E/I/00007039); JAH and  
101 WG were further supported by BBS/E/I/00007030 and BBS/E/I/00007031.

102

### 103 **Literature Cited**

- 104 1. Laidlaw BJ, Craft JE, Kaech SM. The multifaceted role of CD4+ T cells in CD8+ T  
105 cell memory. *Nat. Rev. Immunol.* 2016;16:102–111.
- 106 2. Davis WC, Brown WC, Hamilton MJ, Wyatt CR, Orden JA, Khalid AM, Naessens  
107 J. Analysis of monoclonal antibodies specific for the  $\gamma\delta$  TcR. *Vet. Immunol.*  
108 *Immunopathol.* 1996;52:275–283.
- 109 3. Baldwin CL, Damani-Yokota P, Yirsaw A, Loonie K, Teixeira AF, Gillespie A.  
110 Special features of  $\gamma\delta$  T cells in ruminants. *Mol. Immunol.* 2021;134:161–169.  
111 Available at: <https://doi.org/10.1016/j.molimm.2021.02.028>.
- 112 4. Telfer JC, Baldwin CL. Bovine gamma delta T cells and the function of gamma  
113 delta T cell specific WC1 co-receptors. *Cell. Immunol.* 2015;296:76–86. Available at:  
114 <http://dx.doi.org/10.1016/j.cellimm.2015.05.003>.
- 115 5. Howard CJ, Morrison WI, Bensaid A, Davis W, Eskra L, Gerdes J, Hadam M,  
116 Hurley D, Leibold W, Letesson J-J, MacHugh N, Naessens J, O'Reilly K, Parsons KR,  
117 Schlote D, Sopp P, Splitter G, Wilson R. Summary of workshop findings for  
118 leukocyte antigens of cattle. *Vet. Immunol. Immunopathol.* 1991;27:21–27. Available

- 119 at: <https://linkinghub.elsevier.com/retrieve/pii/016524279190072K>.
- 120 6. Naessens J, Hopkins J. Introduction and summary of workshop findings. *Vet.*  
121 *Immunol. Immunopathol.* 1996;52:213–235. Available at:  
122 <https://linkinghub.elsevier.com/retrieve/pii/0165242796055663>.
- 123 7. Sopp P, Werling D, Baldwin C. Cross-reactivity of mAbs to human CD antigens  
124 with cells from cattle. *Vet. Immunol. Immunopathol.* 2007;119:106–114. Available at:  
125 <https://linkinghub.elsevier.com/retrieve/pii/S0165242707002206>.
- 126 8. Howard CJ, Naessens J. 4.1 Summary of workshop findings for cattle (Tables 1  
127 and 2). *Vet. Immunol. Immunopathol.* 1993;39:25–47. Available at:  
128 <https://linkinghub.elsevier.com/retrieve/pii/016524279390161V>.
- 129 9. Baldwin CL, Telfer JC. The bovine model for elucidating the role of  $\gamma\delta$  T cells in  
130 controlling infectious diseases of importance to cattle and humans. *Mol. Immunol.*  
131 2015;66:35–47. Available at: <http://dx.doi.org/10.1016/j.molimm.2014.10.024>.
- 132 10. Coussens PM, Sipkovsky S, Murphy B, Roussey J, Colvin CJ. Regulatory T cells in  
133 cattle and their potential role in bovine paratuberculosis. *Comp. Immunol.*  
134 *Microbiol. Infect. Dis.* 2012;35:233–239. Available at:  
135 <http://dx.doi.org/10.1016/j.cimid.2012.01.004>.
- 136 11. Caruso A, Licenziati S, Corulli M, Canaris AD, De Francesco MA, Fiorentini S,  
137 Peroni L, Fallacara F, Dima F, Balsari A, Turano A. Flow cytometric analysis of  
138 activation markers on stimulated T cells and their correlation with cell proliferation.  
139 *Cytometry* 1997;27:71–6. Available at:  
140 <http://www.ncbi.nlm.nih.gov/pubmed/9000587>.
- 141 12. Waters WR, Rahner TE, Palmer M V., Cheng D, Nonnecke BJ, Whipple DL.

- 142 Expression of L-selectin (CD62L), CD44, and CD25 on activated bovine T cells.  
143 *Infect. Immun.* 2003;71:317–326.
- 144 13. Golubovskaya V, Wu L. Different subsets of T cells, memory, effector functions,  
145 and CAR-T immunotherapy. *Cancers (Basel)*. 2016;8.
- 146 14. Bembridge GP, MacHugh ND, McKeever D, Awino E, Sopp P, Collins RA,  
147 Gelder KI, Howard CJ. CD45RO expression on bovine T cells: relation to biological  
148 function. *Immunology* 1995;86:537–44. Available at:  
149 <http://www.ncbi.nlm.nih.gov/pubmed/8567018>[http://www.pubmedcentral.](http://www.pubmedcentral.nih.gov/articlerender.fcgi?artid=PMC1384052)  
150 [nih.gov/articlerender.fcgi?artid=PMC1384052](http://www.pubmedcentral.nih.gov/articlerender.fcgi?artid=PMC1384052).
- 151 15. Whelan AO, Villarreal-Ramos B, Vordermeier HM, Hogarth PJ. Development of  
152 an antibody to bovine IL-2 reveals multifunctional CD4 T EM cells in cattle naturally  
153 infected with bovine tuberculosis. *PLoS One* 2011;6:2–9.



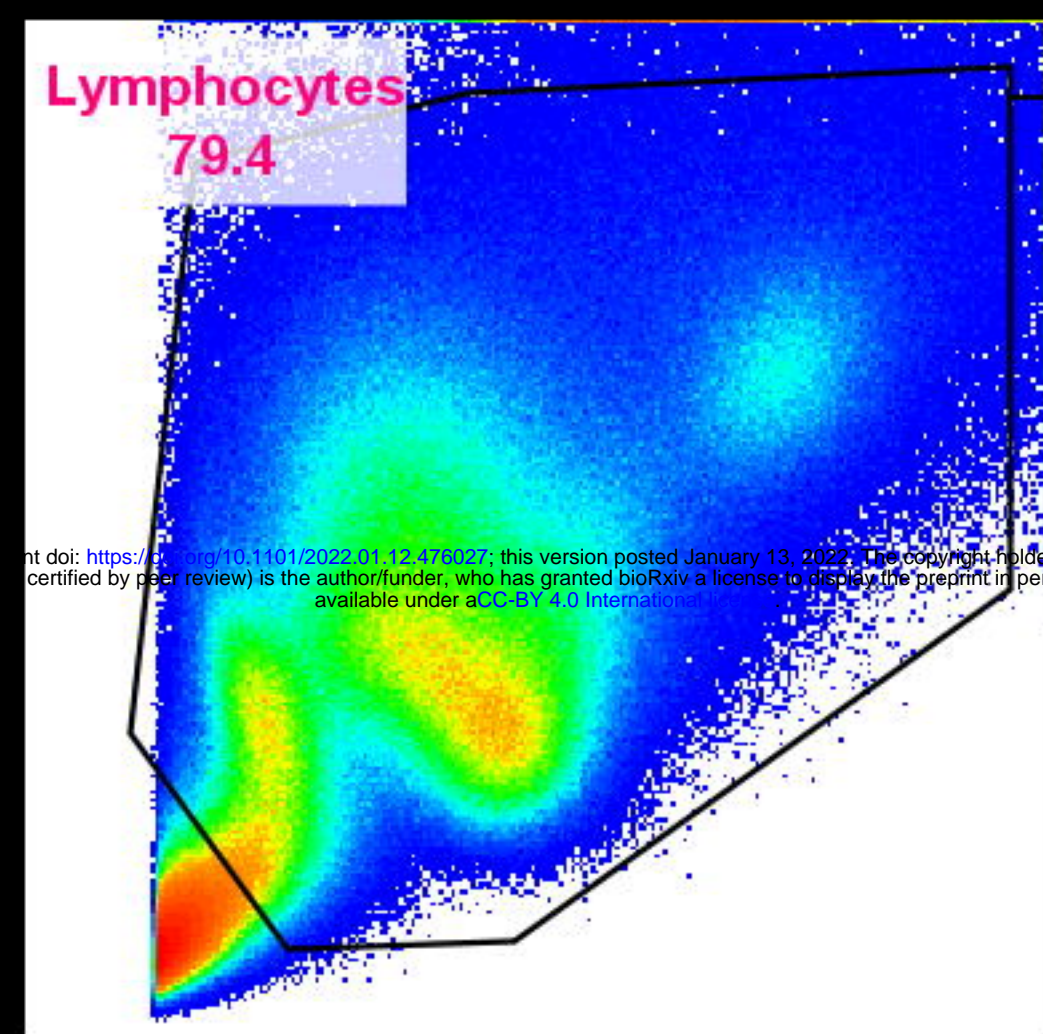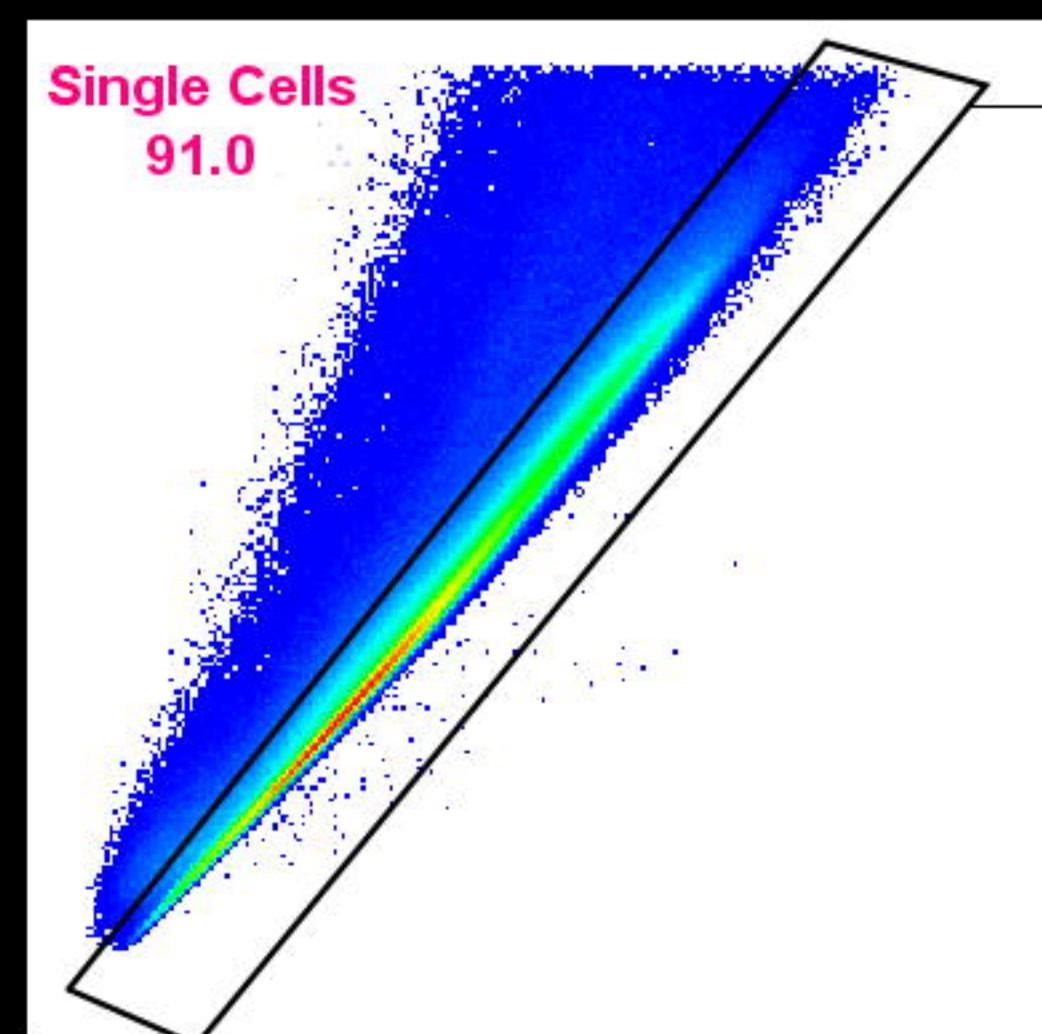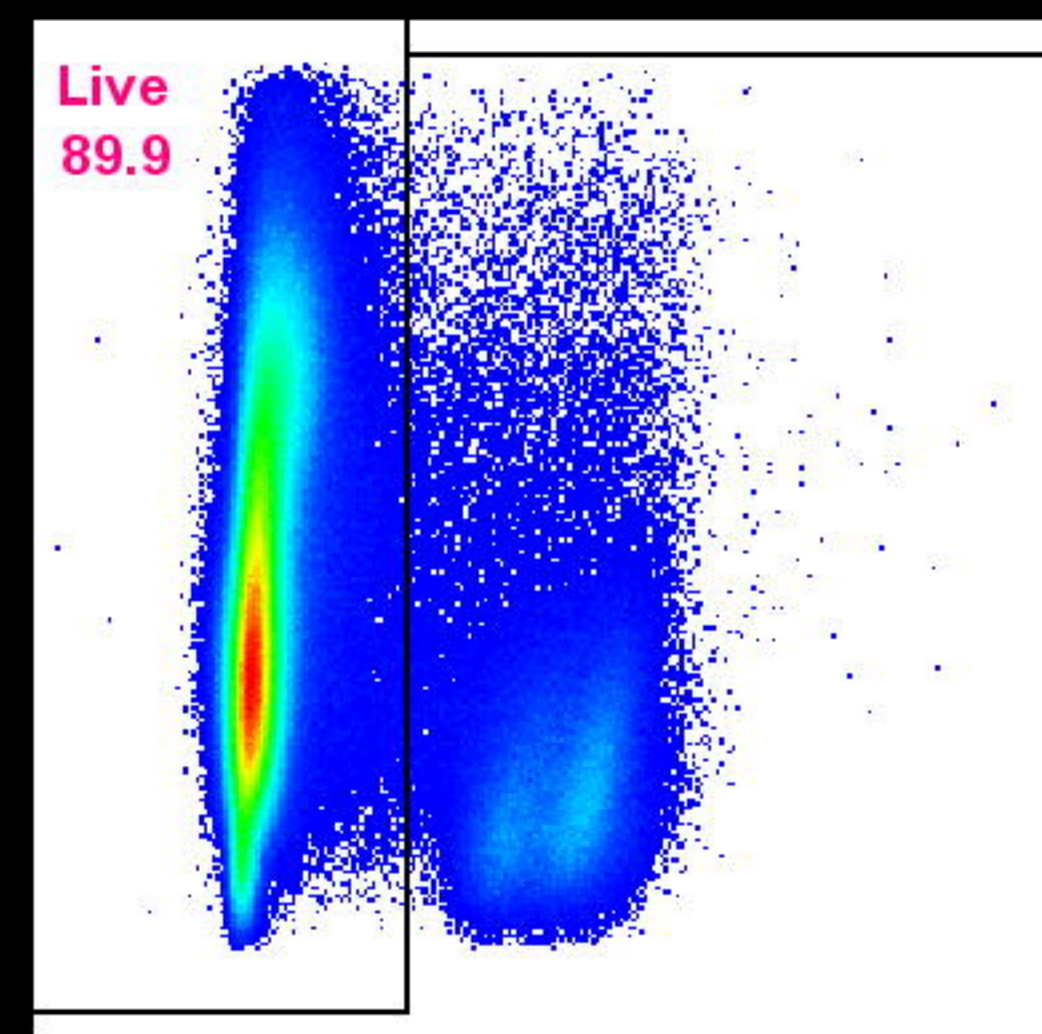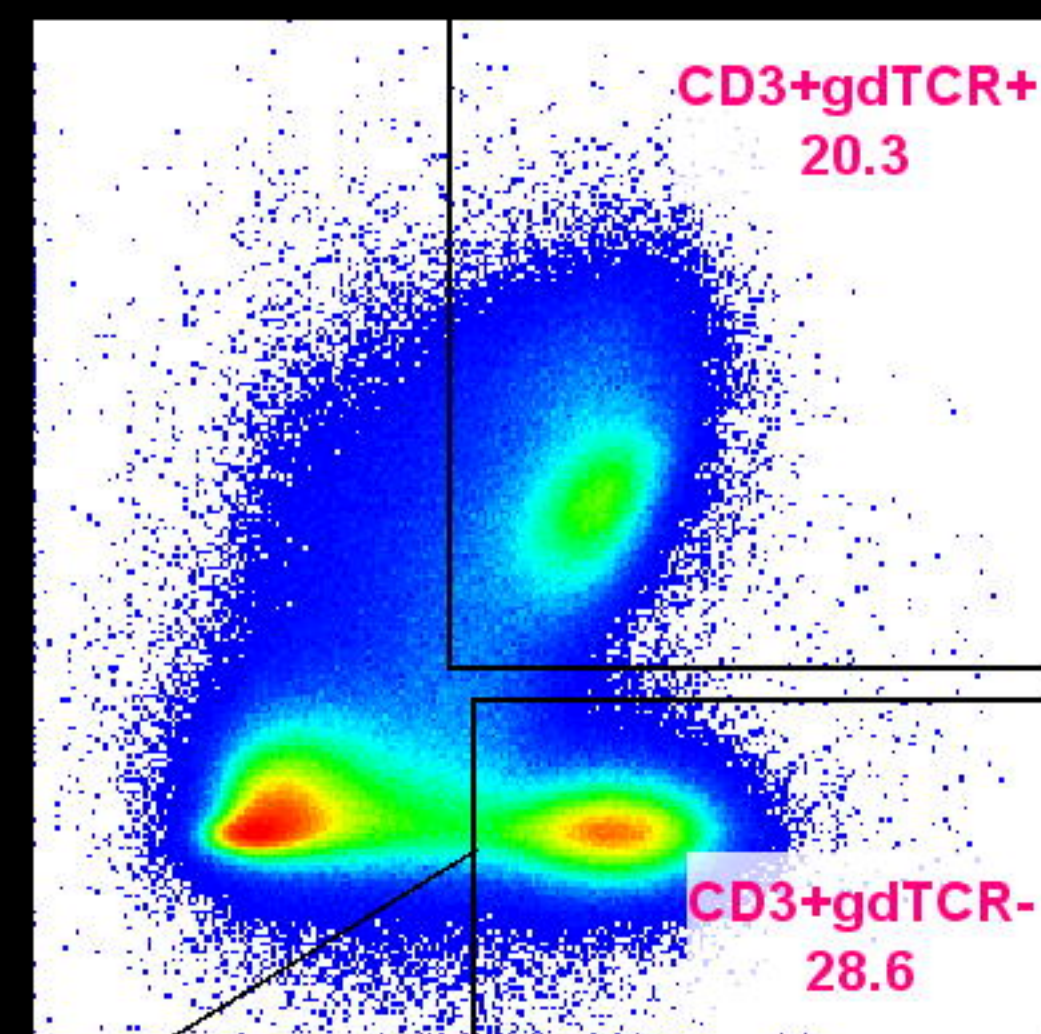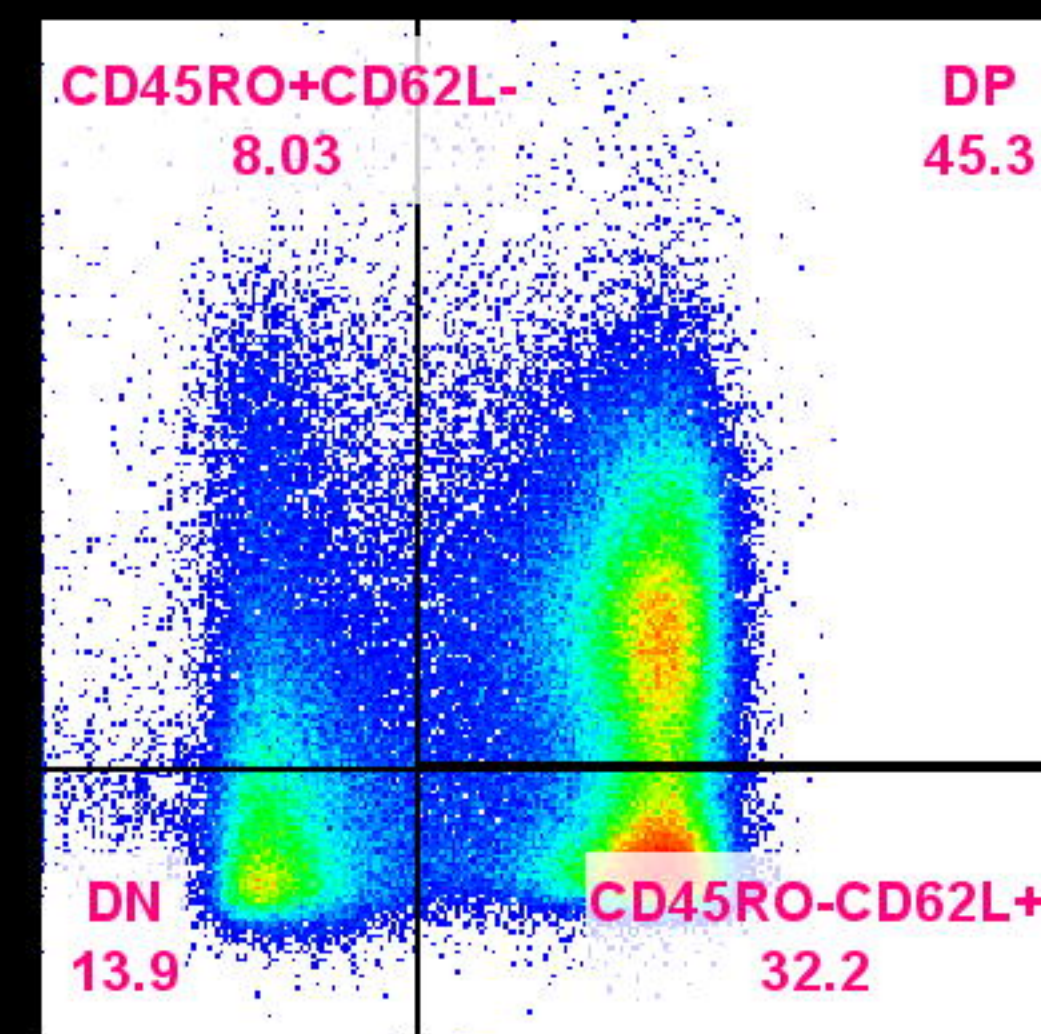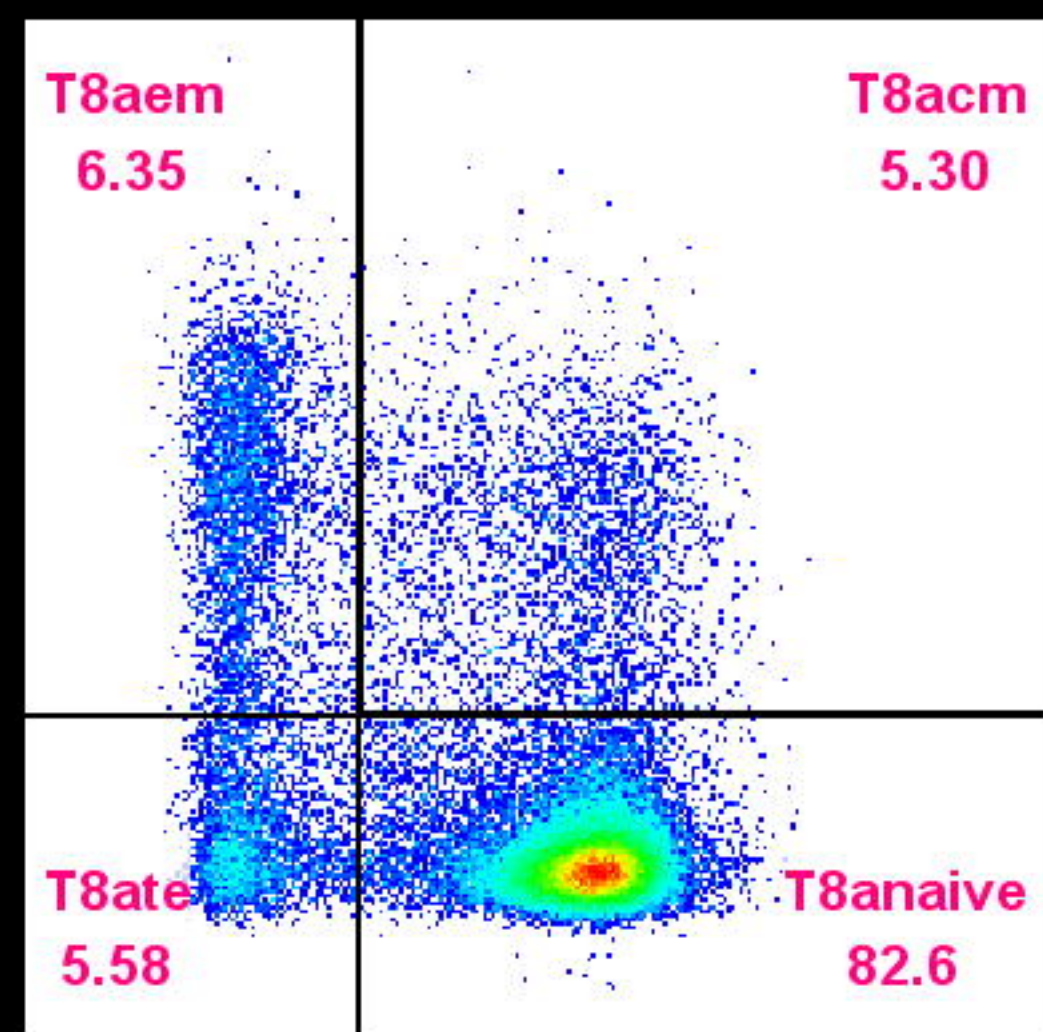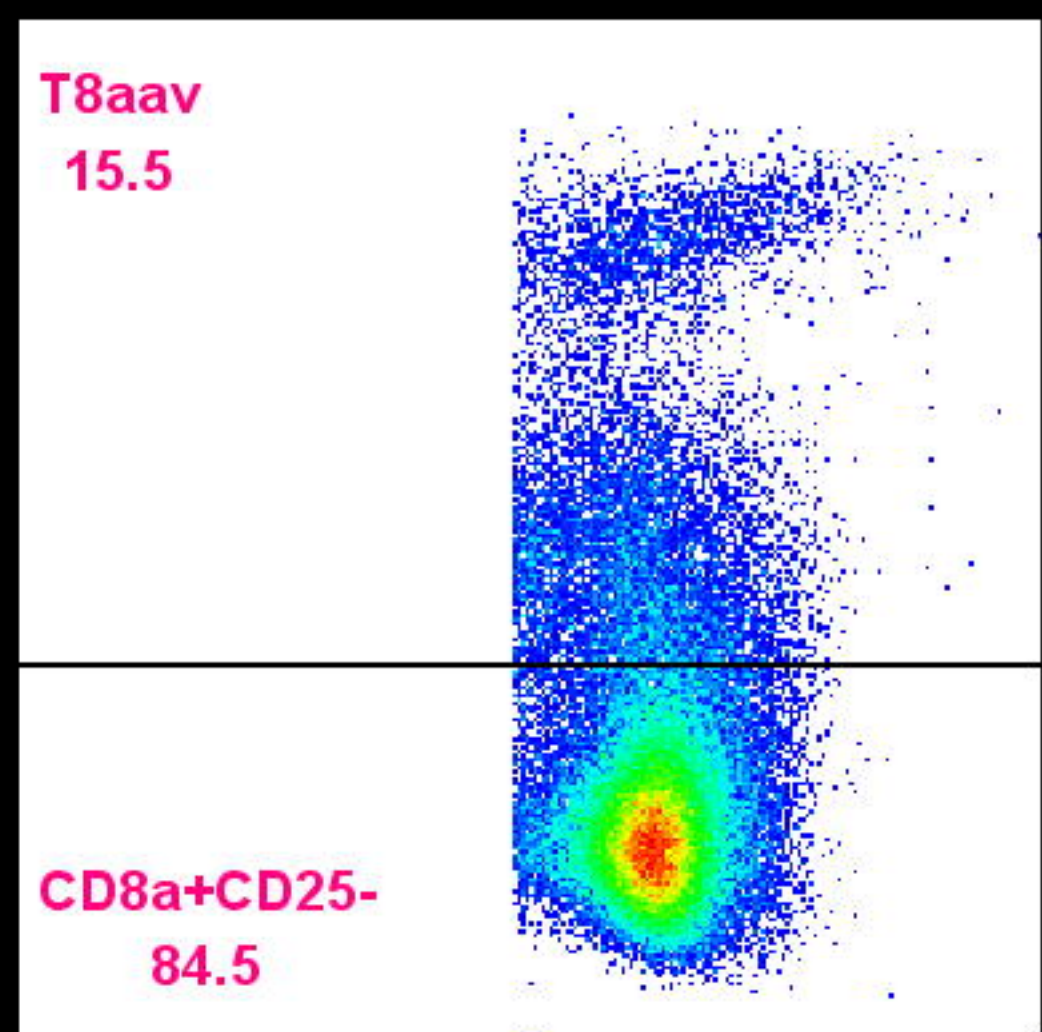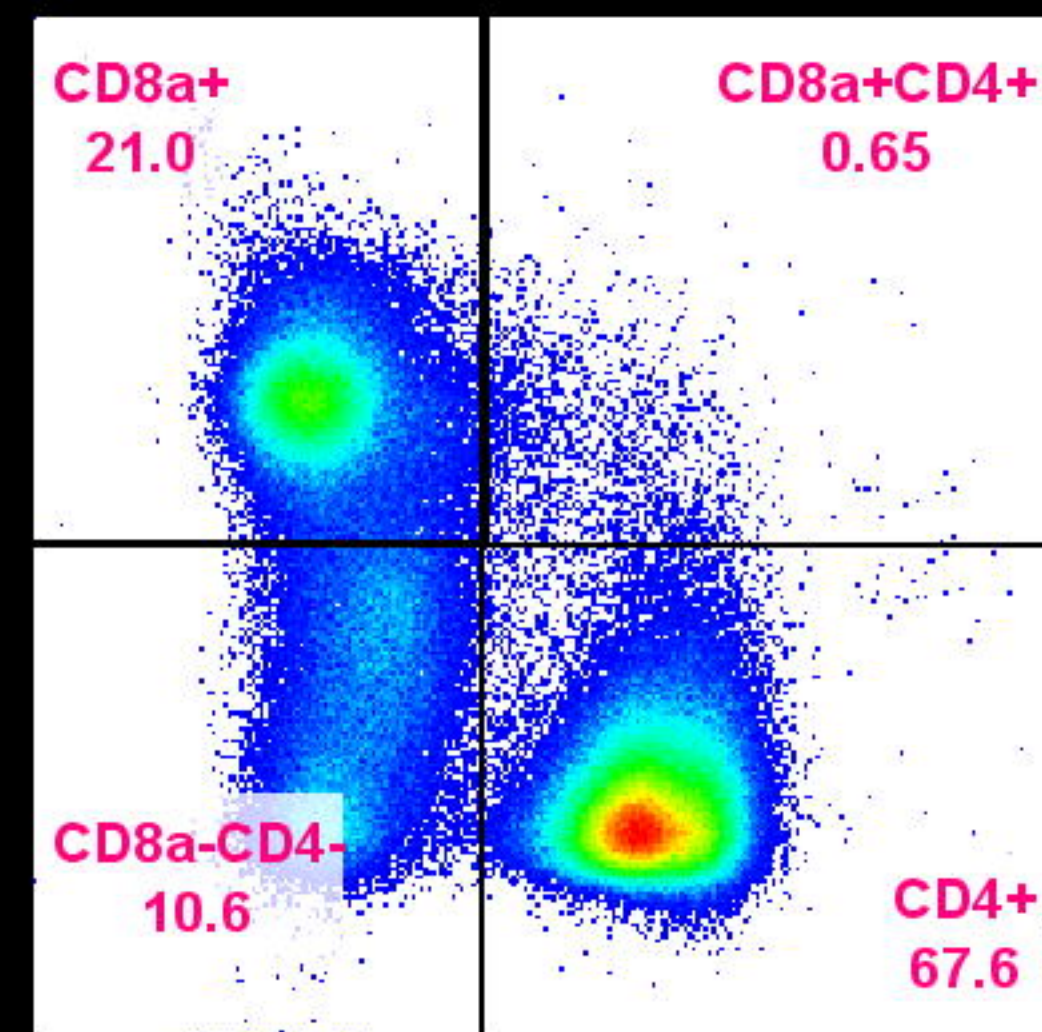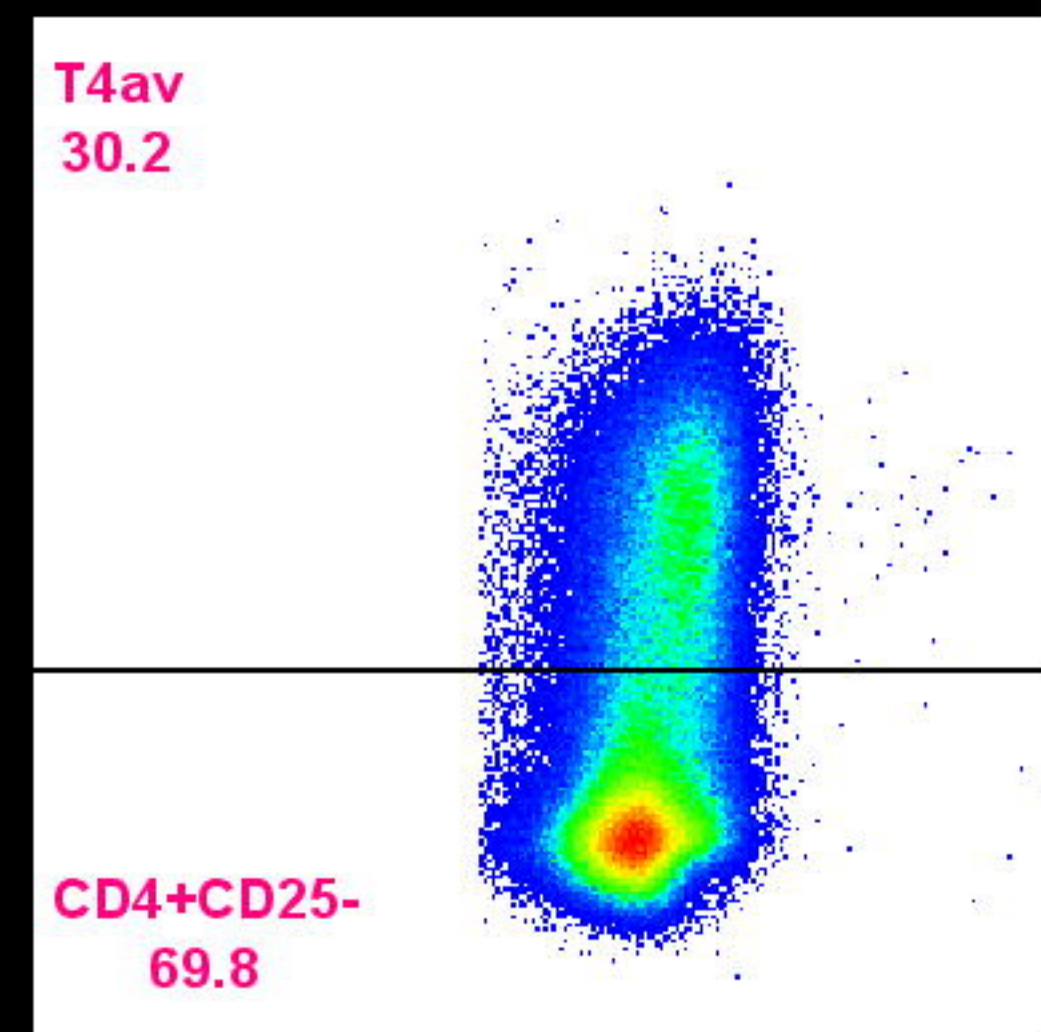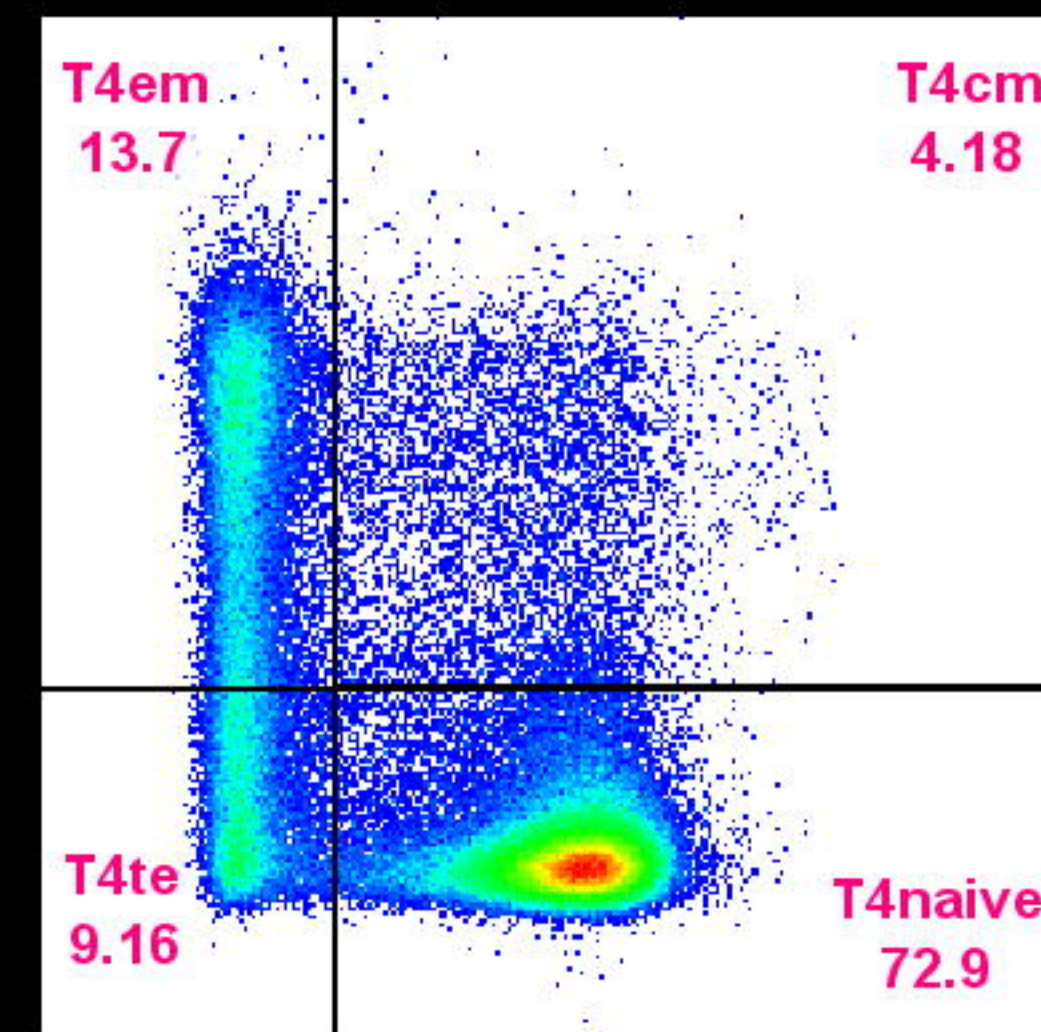

Source: http://biorxiv.org/content/10.1101/2022.01.12.476027v1.full.pdf
